# Supplementary material for: Reliability and validity of “My Jump 2” application for countermovement jump free arm and interlimb jump symmetry in different sports of professional athletes
Source: PeerJ. 2024 Jul 9;12:e17658. doi: 10.7717/peerj.17658 (PMC11244033; doi:10.7717/peerj.17658)
Supplement: Supplemental Information 2 [file peerj-12-17658-s002.xlsx]

## Sheet: Fencing-CMJ male
First Name	Last Name	Project	Lower Extremities	Upper Extremities	Repetition	Jump Height from Take Off V [m]	Jump Height from Flight T [m]	Start interval relative F [%BW]	Start interval relative P [W/kg]	Start interval A [m/s^2]	Start interval V [m/s]	Relative maximal F [%BW]	Relative maximal F during Counter Movement [%BW]	Relative maximal F during Push Off [%BW]	Relative maximal F in the 1st half of Push Off [%BW]	Relative maximal F in the 2nd half of Push Off [%BW]	Relative minimal F [%BW]	Relative maximal P [W/kg]	Relative E [J/kg]	A [m/s^2]	A in the 1st half of Push Off [m/s^2]	A in the 2nd half of Push Off [m/s^2]	Vertical Take Off V [m/s]	Average P [W]	Average F [N]	Average V [m/s]	Jump T [s]	Counter Movement T [s]	Push Off T [s]	Ratio between Counter Movement and Push Off T [%]	Flight T [s]	Breaking T [s]	T to maximal F [s]	T to minimal F [s]	Push Off FI [Ns]	Push Off FI from Flight T [Ns]	Negative FI [Ns]	Positive FI [Ns]	FI in the 1st half of Push Off [Ns]	FI in the 2nd half of Push Off [Ns]	Ratio between FI in both halves of Push Off [%]	Left leg - Start interval relative P [W/kg]	Left leg - Relative maximal F [%BW]	Left leg - Relative maximal P [W/kg]	Left leg - Relative E [J/kg]	Left leg - Push Off FI [Ns]	Right leg - Start interval relative P [W/kg]	Right leg - Relative maximal F [%BW]	Right leg - Relative maximal P [W/kg]
A1	B1	1Myjump2	Bilateral	Free	3	0.419	0.462	236	7.74	13.3	0.329	283	224	283	278	283	47	68.6	7.81	4.12	14.8	10.6	3.01	2590	1690	1.66	0.694	0.469	0.225	208	0.614	0.325	0.606	0.144	214	225	-76.1	290	123	88.9	138	7.45	283	68.2	7.74	214	0.00747	0.374	0.109
A1	B1	1Myjump2	Bilateral	Free	2	0.457	0.465	223	6.68	12.1	0.302	269	216	269	264	269	50	69.8	8.76	3.95	13.6	9.95	3.02	2590	1610	1.73	0.757	0.504	0.253	199	0.616	0.336	0.667	0.168	223	226	-74.1	298	127	93.5	136	6.42	269	69.5	8.69	223	0.00711	0.383	0.107
A1	B1	1Myjump2	Bilateral	Free	1	0.41	0.494	217	6.29	11.5	0.3	263	229	263	239	263	55.7	63.6	7.79	2.58	11.4	11	3.11	2310	1570	1.53	1.1	0.844	0.252	335	0.635	0.347	1.02	0.497	211	233	-94.4	306	107	103	104	6.02	263	63.2	7.71	211	0.00753	0.409	0.0948
A1	B1	1Myjump2	Bilateral	On Hips	4	0.17	0.00518	226	7.09	12.4	0.322	261	231	261	261	1.73	55.9	74.4	10.4	-1.49	5.15	-9.66	0.319	956	564	1.09	1.23	0.421	0.811	51.9	0.065	0.252	0.619	0.169	-137	23.8	-64.2	-72.5	156	-292	-53.4	6.79	261	74.1	10.3	-74.8	0.00737	0.418	0.109
A2	B2	1Myjump2	Bilateral	Free	1	0.516	0.443	206	5.44	10.4	0.271	268	211	268	221	268	30.7	69.1	10.2	4.73	9.79	10.7	2.95	2690	1640	1.68	0.672	0.362	0.31	117	0.601	0.231	0.57	0.131	260	241	-70.7	331	123	136	90.5	5.21	268	68.8	10.1	260	0.00433	0.326	0.082
A2	B2	1Myjump2	Bilateral	Free	2	0.506	0.468	210	5.74	10.8	0.281	269	216	269	248	269	29	69	9.59	4.54	11.3	11.1	3.03	2800	1720	1.69	0.693	0.413	0.28	148	0.618	0.254	0.593	0.159	257	248	-89.4	347	128	127	101	5.5	269	68.7	9.51	257	0.00536	0.314	0.0851
A2	B2	1Myjump2	Bilateral	Free	3	0.498	0.476	230	7.48	12.8	0.338	258	249	258	244	258	38.2	68.2	9.98	3.43	10.9	10	3.06	2740	1660	1.74	0.91	0.612	0.298	205	0.623	0.234	0.813	0.378	255	250	-113	369	132	122	108	7.15	258	67.8	9.88	255	0.00628	0.322	0.0895
A3	B3	1Myjump2	Bilateral	Free	1	0.506	0.45	220	6.38	11.7	0.292	293	213	293	290	293	39.3	75.1	9.24	5.07	14.4	11.2	2.97	2270	1370	1.78	0.62	0.375	0.245	153	0.606	0.242	0.521	0.133	190	179	-57.3	247	105	82.4	127	6.14	293	74.7	9.17	190	0.00437	0.332	0.08
A3	B3	1Myjump2	Bilateral	Free	2	0.501	0.462	237	7.86	13.5	0.329	309	220	309	305	309	41.2	77.8	8.99	4.88	15.8	11.6	3.01	2370	1420	1.81	0.642	0.413	0.229	180	0.614	0.261	0.543	0.152	189	182	-57.5	247	109	80	136	7.58	308	77.5	8.92	189	0.00741	0.392	0.0976
A3	B3	1Myjump2	Bilateral	Free	3	0.474	0.459	233	7.53	13.1	0.324	292	225	292	290	292	29.4	72.6	8.69	4.8	15.2	10.8	3	2240	1380	1.76	0.634	0.4	0.234	171	0.612	0.278	0.527	0.122	183	181	-70.6	255	106	75.9	140	7.24	292	72.2	8.62	183	0.00667	0.326	0.0945
A4	B4	1Myjump2	Bilateral	Free	1	0.42	0.414	225	6.83	12.3	0.304	256	211	256	256	254	48	60.1	8.47	3.97	13.6	8.49	2.85	2180	1390	1.71	0.721	0.462	0.259	178	0.581	0.375	0.577	0.087	191	190	-63.8	255	116	72.8	160	6.58	256	59.8	8.4	191	0.00359	0.354	0.0693
A4	B4	1Myjump2	Bilateral	Free	2	0.458	0.485	233	7.58	13.1	0.329	271	228	271	271	271	35	64.3	8.86	4.17	14.4	9.48	3.09	2350	1450	1.77	0.718	0.467	0.251	186	0.629	0.318	0.591	0.149	200	206	-86.7	287	120	79.4	151	7.29	270	63.9	8.78	200	0.00446	0.31	0.0679
A4	B4	1Myjump2	Bilateral	Free	3	0.438	0.479	268	10.8	16.5	0.4	288	248	288	288	265	34.1	61.9	8.29	4.18	17	8.83	3.07	2450	1520	1.8	0.7	0.474	0.226	210	0.625	0.322	0.525	0.152	195	204	-91.1	287	127	66.3	192	10.4	288	61.5	8.21	195	0.00556	0.28	0.0642
A5	B5	1Myjump2	Bilateral	Free	1	0.494	0.477	230	7.41	12.8	0.331	246	231	246	234	246	43.9	66.8	10.3	2.98	11	8.84	3.06	2470	1480	1.77	1.04	0.73	0.314	232	0.624	0.432	0.964	0.298	234	230	-93.4	328	129	104	124	7.12	246	66.5	10.2	234	0.00619	0.301	0.0825
A5	B5	1Myjump2	Bilateral	Free	2	0.525	0.536	272	11.7	16.8	0.453	295	295	295	295	249	44.8	68.4	11	3.21	11.8	8.71	3.24	2640	1510	1.9	1	0.687	0.313	219	0.661	0.328	0.681	0.359	241	244	-119	361	137	102	134	11.2	295	67.9	10.8	240	0.00665	0.279	0.0708
A5	B5	1Myjump2	Bilateral	Free	3	0.45	0.446	238	8.09	13.5	0.351	252	243	252	244	252	53.4	65.3	9.49	2.76	11.1	8.67	2.96	2390	1480	1.74	1.07	0.774	0.299	259	0.603	0.397	0.986	0.377	222	223	-84.5	308	125	97.8	127	7.76	252	64.9	9.4	223	0.00532	0.275	0.0662
A6	B6	1Myjump2	Bilateral	Free	1	0.456	0.464	206	5.35	10.4	0.262	267	200	267	253	267	74	69.2	9.06	2.95	11.7	9.94	3.02	2180	1370	1.68	1.01	0.734	0.277	265	0.615	0.539	0.921	0.195	199	201	-55.1	254	107	91.7	117	5.14	267	69	9	199	0.00341	0.276	0.0677
A6	B6	1Myjump2	Bilateral	Free	2	0.462	0.479	216	6.12	11.4	0.289	255	214	255	232	255	62.8	67.2	9.32	3.04	11.2	9.73	3.07	2150	1350	1.69	0.99	0.702	0.288	244	0.625	0.497	0.905	0.205	200	204	-69	269	106	93.1	114	5.88	255	66.9	9.25	200	0.0027	0.261	0.0771
A6	B6	1Myjump2	Bilateral	Free	3	0.412	0.427	188	4	8.64	0.214	244	180	244	237	244	64.8	60.1	8.82	2.83	10.2	8.4	2.89	1930	1270	1.6	1	0.699	0.304	230	0.59	0.53	0.889	0.169	189	193	-58.2	247	103	84.8	121	3.85	243	59.9	8.77	189	0.00292	0.291	0.073
[truncated: 29 more columns]

## Sheet: Fence-DJ male
First Name	Last Name	Project	Lower Extremities	Upper Extremities	Drop Height [cm]	Repetition	Jump height from Take Off V [m]	Jump height from Flight T [m]	Ratio between jump height and Contact T [m/s]	Start interval relative F [%BW]	Start interval relative P [W/kg]	Start interval A [m/s^2]	Start interval V [m/s]	Relative maximal F [%BW]	Relative maximal F during Counter Movement [%BW]	Relative maximal F during Push Off [%BW]	Relative maximal F in the 1st half of Push Off [%BW]	Relative maximal F in the 2nd half of Push Off [%BW]	Relative maximal P [W/kg]	Relative E [J/kg]	Counter Movement A [m/s^2]	Push Off A [m/s^2]	Vertical Take Off V [m/s]	Drop Jump / Squat Jump height ratio [%]	Average P [W]	Average F [N]	Average V [m/s]	Contact T [s]	Flight T [s]	Counter Movement T [s]	Push Off T [s]	Ratio between Counter Movement and Push Off T [%]	T to maximal F [s]	T between maximal F and Take Off [s]	Total FI [Ns]	Push Off FI from Flight T [Ns]	Counter Movement FI [Ns]	Push Off FI [Ns]	Ratio between Counter Movement and Push Off FI [%]	FI between Start and maximal F [Ns]	FI between maximal F and Take Off [Ns]	Ratio between FI before and after maximal F [%]	Left leg - Start interval relative P [W/kg]	Left leg - Relative maximal F [%BW]	Left leg - Relative maximal P [W/kg]	Left leg - Relative E [J/kg]	Left leg - Push Off FI [Ns]	Right leg - Start interval relative P [W/kg]	Right leg - Relative maximal F [%BW]
A1	B1	1Myjump2	Unilateral - Left	Free	30	1	0.293	0.267	0.801	278	12.1	17.4	0.44	295	275	295	295	290	53.6	5.69	10.2	13	2.29	NaN	2310	1710	1.54	0.334	0.467	0.15	0.184	81.5	0.225	0.109	294	171	114	179	63.4	214	78.7	272	11.6	295	53.1	5.61	179	0.00811	0.332
A1	B1	1Myjump2	Unilateral - Right	Free	30	1	0.012	0.00345	0.0689	1.26	-0.0305	-9.69	-0.247	1.36	0	1.36	1.36	1.32	0	-0.00155	NaN	-9.69	0.26	NaN	-2.32	9.22	-0.252	0.05	0.053	-0.001	0.051	-1.96	0	0.05	-35.5	19.4	NaN	-36.2	NaN	NaN	-35.5	NaN	-0.0244	1.14	0	-0.00125	-30.2	-0.00484	0.274
A1	B1	1Myjump2	Unilateral - Left	Free	30	2	0.227	0.284	0.792	283	12.7	17.9	0.455	285	280	285	285	251	42	4.86	11.3	11.4	2.36	NaN	1960	1590	1.44	0.358	0.481	0.173	0.185	93.5	0.206	0.152	305	176	146	158	92.7	190	114	168	12.2	285	41.6	4.79	158	0.00821	0.318
A1	B1	1Myjump2	Unilateral - Right	Free	30	4	0.303	0.292	0.76	253	9.36	15	0.373	270	242	270	270	262	49.6	6.28	8.76	11.4	2.39	NaN	2190	1590	1.56	0.384	0.488	0.17	0.214	79.4	0.248	0.136	295	179	111	182	60.9	201	92	219	9.01	269	49.3	6.21	182	0.00629	0.332
A1	B1	1Myjump2	Unilateral - Left	Free	30	3	0.54	0.286	0.911	262	10.2	15.9	0.388	329	329	311	310	311	77.5	9.55	10.1	14.5	2.37	NaN	3190	1820	1.92	0.314	0.483	0.09	0.224	40.2	0.047	0.267	312	177	67.5	243	27.8	15.5	295	5.24	9.87	329	77.1	9.47	243	0.00777	0.314
A1	B1	1Myjump2	Unilateral - Right	Free	30	3	0.272	0.279	0.738	253	9.5	15.1	0.379	273	250	273	273	259	48.9	6.13	8.79	10.5	2.34	NaN	2070	1520	1.58	0.378	0.477	0.157	0.221	71	0.236	0.142	277	175	103	173	59.6	195	80.7	242	9.13	273	48.5	6.06	173	0.00764	0.318
A2	B2	1Myjump2	Unilateral - Right	Free	30	1	0.213	0.226	0.398	158	2.26	5.67	0.147	252	252	239	183	239	41.5	5.12	6.45	6.85	2.1	NaN	1410	1360	1.04	0.567	0.429	0.269	0.298	90.3	0.065	0.502	310	172	142	167	85	21.8	287	7.58	2.17	252	41.3	5.09	167	0.00237	0.258
A2	B2	1Myjump2	Unilateral - Right	Free	30	2	0.107	0.249	0.51	198	4.58	9.57	0.229	233	233	232	232	229	28.5	2.98	8.67	7.36	2.21	NaN	1240	1400	0.994	0.489	0.451	0.292	0.197	148	0.144	0.345	326	181	207	119	175	91.1	234	38.9	4.42	233	28.3	2.95	119	0.00401	0.298
A2	B2	1Myjump2	Unilateral - Left	Free	30	1	0.012	2.53	50.6	1.16	-0.0276	-9.7	-0.247	1.26	0	1.26	1.26	1.25	0	-0.00141	NaN	-9.7	7.05	NaN	-2.29	9.29	-0.252	0.05	1.44	-0.001	0.051	-1.96	0.013	0.037	-38.9	576	NaN	-39.6	NaN	-9.51	-28.5	33.3	-0.0224	1.1	0	-0.00114	-33.5	-0.00414	0.294
A2	B2	1Myjump2	Unilateral - Right	Free	30	3	0.128	0.276	0.547	208	5.5	10.6	0.267	225	225	219	219	215	28.9	3.5	9.08	7.47	2.32	NaN	1350	1410	1.08	0.504	0.474	0.292	0.212	138	0.072	0.432	347	190	217	129	167	19.2	327	5.87	5.28	225	28.7	3.46	129	0.00469	0.274
A2	B2	1Myjump2	Unilateral - Left	Free	30	2	0.169	0.244	0.562	191	4.21	8.97	0.22	273	273	248	248	248	37	3.85	9.34	8.97	2.19	NaN	1550	1540	1.09	0.434	0.446	0.231	0.203	114	0.054	0.38	326	179	177	149	118	14.5	310	4.68	4.05	272	36.8	3.81	149	0.00303	0.234
A2	B2	1Myjump2	Unilateral - Right	Free	30	4	0.012	0.00319	0.0638	1.22	-0.0293	-9.69	-0.247	1.31	0	1.31	1.3	1.31	0	-0.00149	NaN	-9.69	0.25	NaN	-2.44	9.76	-0.252	0.05	0.051	-0.001	0.051	-1.96	0.033	0.017	-38.8	20.5	NaN	-39.6	NaN	-25.4	-12.7	200	-0.0249	1.13	0	-0.00127	-33.6	-0.00439	0.266
A3	B3	1Myjump2	Unilateral - Left	Free	30	1	0.503	0.203	0.475	233	7.75	13.1	0.344	284	284	253	245	253	68.8	10.9	5.93	9.95	2	NaN	2090	1190	1.93	0.428	0.407	0.112	0.316	35.4	0.046	0.382	230	120	39.9	190	21.1	0.335	229	0.146	7.41	284	68.4	10.8	190	0.00811	0.377
A3	B3	1Myjump2	Unilateral - Left	Free	30	2	0.173	0.213	0.456	217	6.13	11.4	0.285	234	228	234	234	227	35.7	4.5	7.98	8.15	2.05	NaN	1200	1080	1.26	0.468	0.417	0.242	0.226	107	0.32	0.148	228	123	117	111	105	173	54.9	315	5.89	233	35.4	4.45	111	0.00664	0.404
A3	B3	1Myjump2	Unilateral - Right	Free	30	2	0.357	0.23	0.568	243	8.48	14	0.352	261	246	261	261	261	57.5	7.8	7.2	10.5	2.12	NaN	1870	1230	1.74	0.405	0.433	0.154	0.251	61.4	0.268	0.137	227	128	66.8	160	41.9	168	58.2	289	8.15	261	57.2	7.72	160	0.00831	0.377
A3	B3	1Myjump2	Unilateral - Left	Free	30	4	0.214	0.252	0.596	239	8.13	13.7	0.342	256	254	256	256	252	42.4	4.83	9.1	10.1	2.22	NaN	1430	1200	1.35	0.422	0.453	0.218	0.204	107	0.299	0.123	244	134	120	124	96.7	189	54.3	348	7.82	256	42	4.77	124	0.00716	0.393
A3	B3	1Myjump2	Unilateral - Right	Free	30	3	0.125	0.251	0.592	249	9.01	14.6	0.364	257	257	256	256	242	31.9	3.08	9.23	9.29	2.22	NaN	1100	1150	1.11	0.423	0.452	0.254	0.169	150	0.048	0.375	237	134	141	94.5	149	-1.26	237	-0.531	8.67	257	31.6	3.03	94.6	0.00832	0.344
A3	B3	1Myjump2	Unilateral - Right	Free	30	1	0.66	0.263	0.626	225	6.69	12.3	0.29	292	292	258	251	258	77.8	13.2	5.3	11.1	2.27	NaN	2470	1260	2.12	0.42	0.463	0.096	0.324	29.6	0.05	0.37	248	137	30.7	217	14.2	3.47	244	1.42	6.5	292	77.6	13.2	217	0.00673	0.399
A4	B4	1Myjump2	Unilateral - Left	Free	30	1	0.116	0.236	0.492	227	7.05	12.5	0.316	232	232	229	229	219	28.9	3.21	7.87	7.77	2.15	NaN	1100	1170	1.08	0.48	0.439	0.286	0.194	147	0.068	0.412	251	144	150	100	149	6.17	244	2.53	6.77	232	28.7	3.16	101	0.00592	0.313
A4	B4	1Myjump2	Unilateral - Right	Free	30	1	0.159	0.271	0.528	204	5.16	10.2	0.257	243	243	220	220	220	33.8	3.95	7.88	8.13	2.31	NaN	1220	1200	1.12	0.513	0.47	0.296	0.217	136	0.064	0.449	274	154	156	118	132	0.849	272	0.312	4.96	243	33.5	3.91	118	0.00474	0.343
A4	B4	1Myjump2	Unilateral - Left	Free	30	2	0.172	0.233	0.46	187	4.02	8.52	0.221	248	248	212	210	212	34.2	4.76	8.23	6.93	2.14	NaN	1200	1120	1.18	0.507	0.436	0.242	0.265	91.3	0.065	0.442	256	143	133	123	108	12.7	242	5.24	3.85	248	34	4.71	123	0.00415	0.309
A4	B4	1Myjump2	Unilateral - Right	Free	30	2	0.16	0.254	0.512	202	4.99	9.98	0.25	275	275	217	217	217	32.8	4.22	8.88	7.63	2.23	NaN	1210	1160	1.16	0.496	0.455	0.264	0.232	114	0.05	0.446	275	149	156	118	132	6.66	267	2.49	4.8	275	32.6	4.17	118	0.0053	0.323
A4	B4	1Myjump2	Unilateral - Left	Free	30	3	0.204	0.237	0.484	207	5.46	10.5	0.269	298	298	217	217	216	37.1	5.35	8.35	7.77	2.16	NaN	1380	1170	1.32	0.49	0.44	0.232	0.258	89.9	0.05	0.44	263	144	129	134	96.6	-0.566	263	-0.216	5.23	298	36.9	5.3	134	0.00437	0.338
A4	B4	1Myjump2	Unilateral - Right	Free	30	3	0.187	0.256	0.513	204	5.24	10.2	0.262	229	229	211	211	211	35.8	4.91	8.93	7.63	2.24	NaN	1300	1160	1.24	0.499	0.457	0.248	0.251	98.8	0.055	0.444	276	149	148	128	116	9.56	266	3.6	5.03	229	35.5	4.86	128	0.00563	0.392
A5	B5	1Myjump2	Unilateral - Left	Free	30	1	0.171	0.231	0.713	283	12.7	17.9	0.458	311	311	285	285	255	38.4	3.87	14.2	10.9	2.13	NaN	1720	1560	1.3	0.324	0.434	0.155	0.169	91.7	0.031	0.293	304	160	165	138	120	11.5	291	3.94	12.2	311	38	3.8	138	0.00709	0.272
A5	B5	1Myjump2	Unilateral - Right	Free	30	1	0.139	0.228	0.583	248	9.06	14.5	0.375	293	293	253	253	217	30.5	3.75	13	8.33	2.11	NaN	1420	1360	1.21	0.391	0.431	0.192	0.199	96.5	0.038	0.353	313	159	187	124	150	9.27	302	3.07	8.69	293	30.1	3.69	125	0.00561	0.255
A5	B5	1Myjump2	Unilateral - Left	Free	30	2	0.165	0.23	0.804	320	17.3	21.5	0.559	375	375	327	327	262	38.6	3.47	16.2	12.5	2.12	NaN	1810	1680	1.29	0.286	0.433	0.142	0.144	98.6	0.04	0.246	309	160	172	135	127	16.6	290	5.73	16.6	375	38	3.4	135	0.00913	0.289
A5	B5	1Myjump2	Unilateral - Left	Free	30	3	0.167	0.243	0.837	309	15.8	20.5	0.524	381	381	312	312	260	38.5	3.51	16.2	12.4	2.18	NaN	1800	1670	1.28	0.29	0.445	0.143	0.147	97.3	0.044	0.246	312	164	174	136	128	18.6	291	6.4	15.2	381	38	3.44	136	0.00805	0.255
A5	B5	1Myjump2	Unilateral - Right	Free	30	3	0.144	0.218	0.7	297	14.4	19.3	0.498	324	324	301	301	244	34	3.27	14.9	11	2.07	NaN	1610	1570	1.22	0.312	0.422	0.159	0.153	104	0.044	0.268	306	156	178	127	140	14.9	289	5.15	13.8	324	33.6	3.2	127	0.0067	0.267
A5	B5	1Myjump2	Unilateral - Right	Free	30	2	0.126	0.213	0.629	283	12.8	18	0.461	303	303	286	286	236	31.2	3.02	13.2	10.1	2.05	NaN	1460	1500	1.16	0.339	0.417	0.183	0.156	117	0.043	0.296	300	154	181	118	153	10.6	288	3.69	12.3	303	30.8	2.96	118	0.00628	0.289
A6	B6	1Myjump2	Unilateral - Left	Free	30	1	0.0726	0.221	0.512	234	7.7	13.2	0.334	276	276	236	236	213	22.4	2.14	9.93	7.42	2.08	NaN	885	1150	0.899	0.433	0.425	0.272	0.161	169	0.065	0.368	260	139	180	79.4	226	14.4	244	5.88	7.41	276	22.1	2.1	79.5	0.00398	0.274
A6	B6	1Myjump2	Unilateral - Right	Free	30	1	0.106	0.215	0.715	303	15.1	19.9	0.514	308	306	308	308	242	32.2	2.62	13	10.3	2.06	NaN	1240	1340	1.13	0.301	0.419	0.16	0.141	113	0.168	0.133	235	137	138	95.9	144	149	85.1	175	14.5	308	31.7	2.56	96.1	0.00807	0.269
A6	B6	1Myjump2	Unilateral - Right	Free	30	2	0.102	0.233	0.674	281	12.5	17.8	0.457	284	281	284	284	241	29.3	2.5	11.3	9.9	2.14	NaN	1160	1310	1.06	0.346	0.436	0.203	0.143	142	0.219	0.127	247	142	152	93.9	162	171	74.8	229	12.1	284	28.9	2.44	93.9	0.0065	0.264
A6	B6	1Myjump2	Unilateral - Right	Free	30	3	0.229	0.266	0.714	257	9.84	15.4	0.386	274	251	274	274	259	45.6	5.22	10.7	10.4	2.29	NaN	1700	1350	1.47	0.373	0.466	0.169	0.204	82.8	0.24	0.133	262	152	120	141	84.8	194	66.2	294	9.46	274	45.2	5.15	141	0.00504	0.244
A6	B6	1Myjump2	Unilateral - Left	Free	30	2	0.59	0.253	0.718	245	8.76	14.3	0.365	282	230	282	281	282	76.7	11.4	2.26	12.3	2.23	NaN	2740	1470	2.06	0.352	0.454	0.075	0.277	27.1	0.217	0.135	238	148	11.2	226	4.94	156	81.3	192	8.45	282	76.4	11.3	226	0.00395	0.283
A6	B6	1Myjump2	Unilateral - Left	Free	30	3	0.109	0.249	0.631	247	8.8	14.4	0.36	320	320	253	253	240	29	2.67	10.8	9.28	2.21	NaN	1130	1270	1.02	0.395	0.451	0.237	0.158	150	0.056	0.339	268	147	170	97.4	174	14.8	252	5.9	8.47	320	28.7	2.63	97.5	0.00484	0.293
[truncated: 8 more columns]

## Sheet: Fencing-DJ Female
First Name	Last Name	Weight(kg）	Project	Lower Extremities	Upper Extremities	Drop Height [cm]	Repetition	Date	Jump height from Take Off V [m]	Jump height from Flight T [m]	Ratio between jump height and Contact T [m/s]	Start interval relative F [%BW]	Start interval relative P [W/kg]	Start interval A [m/s^2]	Start interval V [m/s]	Relative maximal F [%BW]	Relative maximal F during Counter Movement [%BW]	Relative maximal F during Push Off [%BW]	Relative maximal F in the 1st half of Push Off [%BW]	Relative maximal F in the 2nd half of Push Off [%BW]	Relative maximal P [W/kg]	Relative E [J/kg]	Counter Movement A [m/s^2]	Push Off A [m/s^2]	Vertical Take Off V [m/s]	Drop Jump / Squat Jump height ratio [%]	Average P [W]	Average F [N]	Average V [m/s]	Contact T [s]	Flight T [s]	Counter Movement T [s]	Push Off T [s]	Ratio between Counter Movement and Push Off T [%]	T to maximal F [s]	T between maximal F and Take Off [s]	Total FI [Ns]	Push Off FI from Flight T [Ns]	Counter Movement FI [Ns]	Push Off FI [Ns]	Ratio between Counter Movement and Push Off FI [%]	FI between Start and maximal F [Ns]	FI between maximal F and Take Off [Ns]	Ratio between FI before and after maximal F [%]	Left leg - Start interval relative P [W/kg]	Left leg - Relative maximal F [%BW]	Left leg - Relative maximal P [W/kg]	Left leg - Relative E [J/kg]	Left leg - Push Off FI [Ns]
C1	D1	62.2	1Myjump2	Unilateral - Left	Free	30	1	2022-04-07	0.0713	0.212	0.62	271	11.5	16.7	0.443	299	299	287	287	217	23.4	1.97	12.6	8.6	2.04	NaN	889	1150	0.929	0.342	0.416	0.204	0.138	148	0.15	0.192	234	127	160	73.6	217	95.5	138	69.4	11	299	23	1.92	73.7
C1	D1		1Myjump2	Unilateral - Right	Free	30	1	2022-04-07	0.583	0.158	0.404	205	5.26	10.3	0.261	255	224	255	255	241	66.1	12.7	0.0468	10	1.76	NaN	2340	1230	2.1	0.391	0.359	0.053	0.338	15.7	0.138	0.253	211	110	0.0648	211	0.0308	62.8	148	42.6	5.01	255	65.9	12.6	211
C1	D1		1Myjump2	Unilateral - Left	Free	30	2	2022-04-07	0.102	0.203	0.617	286	13.2	18.3	0.48	298	298	298	298	234	27.9	2.45	12.1	10.2	2	NaN	1090	1250	1.05	0.329	0.407	0.19	0.139	137	0.186	0.143	232	124	143	88.1	162	138	92.9	148	12.7	298	27.5	2.39	88.1
C1	D1		1Myjump2	Unilateral - Right	Free	30	2	2022-04-07	0.198	0.179	0.497	280	12.4	17.7	0.454	289	289	284	284	240	40.5	4.77	9.19	10	1.87	NaN	1510	1230	1.45	0.36	0.382	0.163	0.197	82.7	0.139	0.221	217	117	93	123	75.8	65.6	150	43.7	11.9	289	40.1	4.7	123
C1	D1		1Myjump2	Unilateral - Left	Free	30	3	2022-04-07	0.255	0.19	0.513	269	11.2	16.6	0.427	272	272	272	272	241	43.1	5.73	9.37	10.5	1.93	NaN	1670	1260	1.54	0.371	0.394	0.158	0.213	74.2	0.156	0.215	232	120	91.8	139	66	89.7	141	63.6	10.8	272	42.7	5.65	139
C1	D1		1Myjump2	Unilateral - Right	Free	30	3	2022-04-07	0.166	0.185	0.565	301	14.8	19.7	0.507	304	303	304	304	246	38.5	3.92	10.8	10.6	1.9	NaN	1430	1270	1.36	0.327	0.388	0.157	0.17	92.4	0.165	0.162	218	118	105	112	93.5	115	102	112	14.3	304	38	3.84	112
C2	D2	47	1Myjump2	Unilateral - Left	Free	30	1	2022-04-07	0.172	0.234	0.575	240	8.14	13.7	0.342	247	244	247	247	229	34.4	4.08	9.54	9.32	2.14	NaN	974	898	1.23	0.407	0.437	0.21	0.197	107	0.264	0.143	181	101	94	86.2	109	129	51.3	251	7.83	247	34.1	4.03	86.2
C2	D2		1Myjump2	Unilateral - Right	Free	30	1	2022-04-07	0.0115	0.193	0.476	200	5.06	9.82	0.265	247	247	213	213	168	8.65	0.571	10.3	4.4	1.95	NaN	248	667	0.429	0.406	0.397	0.298	0.108	276	0.118	0.288	167	91.4	144	22.3	647	41.6	125	33.3	4.84	247	8.47	0.553	22.4
C2	D2		1Myjump2	Unilateral - Left	Free	30	2	2022-04-07	0.673	0.22	0.57	229	7.14	12.6	0.313	277	277	254	254	243	71.7	13.8	5.01	10.9	2.08	NaN	1940	972	2.19	0.387	0.424	0.053	0.334	15.9	0.042	0.345	184	97.7	12.3	171	7.23	3.89	179	2.17	6.81	277	71.3	13.7	171
C2	D2		1Myjump2	Unilateral - Right	Free	30	2	2022-04-07	0.459	0.201	0.58	74.2	-1.03	-2.53	-0.123	261	0	261	240	261	62.8	9.23	NaN	8.6	1.99	NaN	1250	864	1.39	0.347	0.405	-0.001	0.348	-0.287	0.215	0.132	141	93.3	NaN	141	NaN	88	52.6	167	-0.959	261	63	9.28	141
C2	D2		1Myjump2	Unilateral - Left	Free	30	3	2022-04-07	0.508	0.218	0.603	223	6.59	12	0.296	268	209	268	267	268	67.1	10.2	1.37	11.3	2.07	NaN	1710	990	1.89	0.362	0.422	0.082	0.28	29.3	0.227	0.135	154	97.2	5.24	148	3.53	100	52.9	190	6.35	267	66.8	10.1	148
C2	D2		1Myjump2	Unilateral - Right	Free	30	3	2022-04-07	0.29	0.181	0.473	232	7.49	13	0.326	243	225	243	243	233	45.4	6.74	5.45	9.47	1.88	NaN	1260	906	1.57	0.382	0.384	0.13	0.252	51.6	0.214	0.168	146	88.4	33.2	112	29.7	85.8	59.4	145	7.21	243	45.1	6.67	112
C3	D3	65.9	1Myjump2	Unilateral - Left	Free	30	1	2022-04-07	0.204	0.232	0.473	187	3.91	8.49	0.211	248	248	227	227	227	37.5	5.06	6.57	7.9	2.13	NaN	1320	1170	1.23	0.491	0.435	0.238	0.253	94.1	0.07	0.421	236	141	103	132	78.2	13.8	221	6.24	3.76	248	37.4	5.02	132
C3	D3		1Myjump2	Unilateral - Right	Free	30	1	2022-04-07	0.222	0.196	0.48	219	6.35	11.7	0.295	233	217	233	233	233	39.9	5.49	6.04	8.56	1.96	NaN	1480	1210	1.38	0.409	0.4	0.165	0.244	67.6	0.281	0.128	204	129	65.7	138	47.7	158	45.5	347	6.11	233	39.7	5.44	138
C3	D3		1Myjump2	Unilateral - Left	Free	30	2	2022-04-07	0.182	0.235	0.502	206	5.42	10.4	0.272	269	269	217	217	210	34	4.78	8.7	7.65	2.15	NaN	1270	1150	1.23	0.469	0.438	0.222	0.247	89.9	0.062	0.407	253	142	127	125	102	16.7	235	7.12	5.18	269	33.8	4.72	125
C3	D3		1Myjump2	Unilateral - Right	Free	30	2	2022-04-07	0.197	0.212	0.505	216	6.28	11.4	0.302	264	264	229	229	224	37	4.98	9.37	8.23	2.04	NaN	1370	1190	1.29	0.42	0.416	0.181	0.239	75.7	0.062	0.358	242	135	112	130	86.2	16.1	225	7.17	6.01	264	36.7	4.92	130
C3	D3		1Myjump2	Unilateral - Left	Free	30	3	2022-04-07	0.213	0.24	0.522	226	7.05	12.4	0.322	231	230	231	231	217	39	5.41	7.86	8.25	2.17	NaN	1440	1190	1.36	0.459	0.442	0.211	0.248	85.1	0.217	0.242	245	143	109	135	81	114	130	88	6.77	231	38.8	5.35	135
C3	D3		1Myjump2	Unilateral - Right	Free	30	3	2022-04-07	0.375	0.198	0.464	210	5.72	10.8	0.281	226	224	226	226	226	50.1	8.99	3.87	8.59	1.97	NaN	1880	1210	1.71	0.427	0.402	0.111	0.316	35.1	0.269	0.158	208	130	28.3	179	15.8	146	61.4	238	5.47	226	49.8	8.92	179
C4	D4	61.6	1Myjump2	Unilateral - Left	Free	30	1	2022-04-07	0.0914	0.211	0.934	110	-0.554	0.953	-0.0606	231	0	231	231	230	23.2	2.47	NaN	5.86	2.04	NaN	670	965	0.709	0.226	0.415	-0.001	0.227	-0.441	0.106	0.12	83	125	NaN	82.5	NaN	40.8	41.5	98.4	-0.448	230	23.4	2.5	82.6
C4	D4		1Myjump2	Unilateral - Right	Free	30	1	2022-04-07	0.0884	0.225	1.01	107	-0.463	0.714	-0.0498	240	0	240	228	240	24.5	2.28	NaN	5.84	2.1	NaN	626	964	0.643	0.223	0.428	-0.001	0.224	-0.446	0.129	0.094	81.7	129	NaN	81.1	NaN	50.4	30.5	165	-0.36	240	24.6	2.31	81.2
C4	D4		1Myjump2	Unilateral - Left	Free	30	2	2022-04-07	0.0739	0.192	0.862	87.7	-0.962	-1.21	-0.103	233	0	233	231	233	21.9	1.99	NaN	5.33	1.94	NaN	547	933	0.578	0.223	0.396	-0.001	0.224	-0.446	0.117	0.106	74.7	120	NaN	74.1	NaN	38.6	35.3	109	-0.879	233	22.1	2.02	74.3
C4	D4		1Myjump2	Unilateral - Right	Free	30	2	2022-04-07	0.09	0.24	0.966	90.3	-0.856	-0.952	-0.0908	224	0	224	222	224	23.2	2.44	NaN	5.3	2.17	NaN	603	930	0.639	0.248	0.442	-0.001	0.249	-0.402	0.134	0.114	82.4	134	NaN	81.8	NaN	44.8	36.9	122	-0.768	224	23.4	2.47	81.9
C4	D4		1Myjump2	Unilateral - Left	Free	30	3	2022-04-07	0.0904	0.214	0.932	74.6	-1.22	-2.5	-0.142	246	0	246	246	241	23.6	2.38	NaN	5.72	2.05	NaN	635	957	0.66	0.23	0.418	-0.001	0.231	-0.433	0.103	0.127	82.6	126	NaN	82	NaN	33	48.8	67.7	-1.15	246	23.8	2.41	82.1
C4	D4		1Myjump2	Unilateral - Right	Free	30	3	2022-04-07	0.104	0.212	1.02	117	-0.396	1.62	-0.0493	247	0	247	241	247	28.4	2.55	NaN	6.77	2.04	NaN	747	1020	0.742	0.209	0.416	-0.001	0.21	-0.476	0.12	0.089	88.7	126	NaN	88.1	NaN	59.4	28.4	209	-0.285	247	28.6	2.58	88.2
C5	D5	71.5	1Myjump2	Unilateral - Left	Free	30	1	2022-04-07	0.357	0.187	0.528	256	9.71	15.3	0.38	293	293	267	267	256	54.2	7.68	9.5	10.9	1.91	NaN	2270	1480	1.75	0.353	0.39	0.111	0.242	45.9	0.059	0.294	265	137	75.2	189	39.8	20.5	244	8.41	9.35	293	53.9	7.6	189
C5	D5		1Myjump2	Unilateral - Right	Free	30	1	2022-04-07	0.145	0.202	0.583	272	11.5	16.9	0.432	315	315	275	275	235	34.5	3.63	12.9	9.51	1.99	NaN	1460	1380	1.25	0.347	0.406	0.169	0.178	94.9	0.038	0.309	278	142	156	121	129	9.46	267	3.54	11.1	315	34.2	3.58	121
C5	D5		1Myjump2	Unilateral - Left	Free	30	2	2022-04-07	0.11	0.205	0.611	265	10.8	16.2	0.422	329	329	277	277	225	27.9	2.78	12.8	9.2	2.01	NaN	1240	1360	1.08	0.336	0.409	0.176	0.16	110	0.06	0.276	267	143	161	105	153	21.2	244	8.68	10.3	329	27.6	2.73	105
C5	D5		1Myjump2	Unilateral - Right	Free	30	2	2022-04-07	0.719	0.207	0.656	127	-0.178	2.64	-0.0392	324	0	324	324	315	88.8	13.6	NaN	11.8	2.02	NaN	3060	1550	2.1	0.316	0.411	-0.001	0.317	-0.315	0.057	0.259	269	144	NaN	269	NaN	21.6	246	8.78	-0.0573	324	89	13.6	269
C5	D5		1Myjump2	Unilateral - Left	Free	30	3	2022-04-07	0.305	0.178	0.61	309	15.7	20.5	0.508	356	356	327	327	287	57	6.24	11	12.9	1.87	NaN	2350	1620	1.72	0.292	0.381	0.102	0.19	53.7	0.066	0.226	256	134	79.7	175	45.6	26.9	227	11.8	15.1	356	56.5	6.16	175
C5	D5		1Myjump2	Unilateral - Right	Free	30	3	2022-04-07	0.424	0.228	0.682	295	14.1	19.2	0.478	304	294	304	304	276	63.8	8.52	8.65	12.7	2.11	NaN	2680	1610	1.94	0.334	0.431	0.107	0.227	47.1	0.146	0.188	273	151	65.9	206	32	119	153	77.4	13.5	304	63.4	8.43	206
C6	D6	54.8	1Myjump2	Unilateral - Left	Free	30	1	2022-04-07	0.319	0.134	0.262	193	4.52	9.11	0.245	299	299	205	205	195	41.7	8.9	7.96	6.48	1.62	NaN	1260	893	1.52	0.51	0.33	0.124	0.386	32.1	0.054	0.456	192	88.7	54.1	137	39.5	9.04	182	4.98	4.32	299	41.5	8.83	137
C6	D6		1Myjump2	Unilateral - Right	Free	30	1	2022-04-07	0.116	0.166	0.406	228	7.16	12.6	0.318	343	343	231	231	212	27.7	3.27	10.5	7.58	1.81	NaN	902	953	1.09	0.409	0.368	0.21	0.199	106	0.059	0.35	204	98.9	121	82.5	146	9.51	193	4.93	6.89	343	27.5	3.23	82.5
C6	D6		1Myjump2	Unilateral - Left	Free	30	2	2022-04-07	0.159	0.172	0.437	209	5.56	10.6	0.272	271	271	223	223	222	32.5	4.08	11.3	8.03	1.84	NaN	1020	978	1.16	0.395	0.375	0.175	0.22	79.5	0.048	0.347	206	101	108	96.8	112	5.24	200	2.63	5.33	271	32.3	4.03	96.8
C6	D6		1Myjump2	Unilateral - Right	Free	30	2	2022-04-07	0.721	0.171	0.428	273	11.6	16.9	0.442	314	198	314	314	244	73.7	15.5	0.0454	10.8	1.83	NaN	2430	1130	2.44	0.399	0.373	0.05	0.349	14.3	0.066	0.333	207	100	0.123	206	0.0596	14.5	191	7.61	11.4	314	73.5	15.4	206
C6	D6		1Myjump2	Unilateral - Left	Free	30	3	2022-04-07	0.653	0.169	0.38	228	7.14	12.5	0.32	253	253	252	252	213	63.1	15	2.27	9.28	1.82	NaN	2140	1050	2.27	0.444	0.371	0.058	0.386	15	0.056	0.388	204	99.7	7.05	196	3.6	5.41	198	2.73	6.8	253	62.8	14.9	196
C6	D6		1Myjump2	Unilateral - Right	Free	30	3	2022-04-07	0.697	0.169	0.41	259	10.3	15.6	0.415	287	238	287	287	239	70.8	15.4	1.26	10.3	1.82	NaN	2360	1100	2.42	0.412	0.371	0.054	0.358	15.1	0.068	0.344	207	99.7	3.61	203	1.78	16.4	190	8.63	9.89	287	70.4	15.3	203
[truncated: 10 more columns]

## Sheet: Fencing-CMJ Female
First Name	Last Name	Weight(kg）	Project	Visit	Lower Extremities	Upper Extremities	Repetition	Date	Jump Height from Take Off V [m]	Jump Height from Flight T [m]	Start interval relative F [%BW]	Start interval relative P [W/kg]	Start interval A [m/s^2]	Start interval V [m/s]	Relative maximal F [%BW]	Relative maximal F during Counter Movement [%BW]	Relative maximal F during Push Off [%BW]	Relative maximal F in the 1st half of Push Off [%BW]	Relative maximal F in the 2nd half of Push Off [%BW]	Relative minimal F [%BW]	Relative maximal P [W/kg]	Relative E [J/kg]	A [m/s^2]	A in the 1st half of Push Off [m/s^2]	A in the 2nd half of Push Off [m/s^2]	Vertical Take Off V [m/s]	Average P [W]	Average F [N]	Average V [m/s]	Jump T [s]	Counter Movement T [s]	Push Off T [s]	Ratio between Counter Movement and Push Off T [%]	Flight T [s]	Breaking T [s]	T to maximal F [s]	T to minimal F [s]	Push Off FI [Ns]	Push Off FI from Flight T [Ns]	Negative FI [Ns]	Positive FI [Ns]	FI in the 1st half of Push Off [Ns]	FI in the 2nd half of Push Off [Ns]	Ratio between FI in both halves of Push Off [%]	Left leg - Start interval relative P [W/kg]	Left leg - Relative maximal F [%BW]	Left leg - Relative maximal P [W/kg]	Left leg - Relative E [J/kg]	Left leg - Push Off FI [Ns]
C1	D1	62.2	1Myjump2	Experiment in fencing	Bilateral	Free	1	2022-04-07	0.348	0.332	228	7.19	12.6	0.322	231	226	231	231	231	46.5	53.1	7.38	3.01	11.2	8.31	2.55	1720	1220	1.51	0.867	0.6	0.267	225	0.52	0.363	0.794	0.237	162	159	-70	233	92.3	68.7	134	6.9	231	52.8	7.31	162
C1	D1		1Myjump2	Experiment in fencing	Bilateral	Free	2	2022-04-07	0.352	0.333	210	5.68	10.8	0.278	230	212	230	212	230	40.6	52.5	7.65	3.11	9.58	8.38	2.56	1630	1170	1.47	0.844	0.552	0.292	189	0.521	0.331	0.763	0.221	163	159	-73.8	237	86.4	76.1	113	5.45	230	52.3	7.59	163
C1	D1		1Myjump2	Experiment in fencing	Bilateral	Free	3	2022-04-07	0.355	0.342	228	7.23	12.6	0.326	238	231	238	232	238	49.4	54.5	7.45	3.14	11.6	8.43	2.59	1760	1230	1.54	0.838	0.575	0.263	219	0.528	0.322	0.756	0.253	164	161	-69.4	233	94.4	69.2	137	6.94	237	54.1	7.38	163
C2	D2	47	1Myjump2	Experiment in fencing	Bilateral	Free	1	2022-04-07	0.317	0.325	195	4.4	9.28	0.225	263	183	263	260	263	49.8	53.7	6.5	3.4	11.8	8.84	2.53	1270	946	1.43	0.733	0.492	0.241	204	0.515	0.336	0.629	0.156	117	119	-39.5	157	65.9	49.7	133	4.24	263	53.4	6.45	117
C2	D2		1Myjump2	Experiment in fencing	Bilateral	Free	2	2022-04-07	0.327	0.335	201	4.96	9.91	0.25	258	199	258	248	258	51.3	54.4	6.76	3.31	11.4	8.85	2.57	1270	935	1.45	0.764	0.514	0.25	206	0.523	0.332	0.669	0.182	119	120	-43.2	162	66.1	51.8	128	4.76	257	54.1	6.7	119
C2	D2		1Myjump2	Experiment in fencing	Bilateral	Free	3	2022-04-07	0.356	0.347	220	6.38	11.8	0.291	266	211	266	264	266	31.6	56.6	7	3.83	13.5	9.22	2.61	1420	994	1.54	0.689	0.457	0.232	197	0.532	0.3	0.584	0.157	124	123	-50.4	175	72.8	50.1	145	6.14	266	56.3	6.94	124
C3	D3	65.9	1Myjump2	Experiment in fencing	Bilateral	Free	1	2022-04-07	0.312	0.351	187	4.08	8.58	0.225	243	195	243	201	243	63.8	51.3	7.03	2.63	8.24	8.26	2.62	1550	1190	1.35	0.94	0.641	0.299	214	0.535	0.508	0.847	0.133	163	173	-58.7	222	80.9	81.2	99.7	3.91	242	51	6.97	163
C3	D3		1Myjump2	Experiment in fencing	Bilateral	Free	2	2022-04-07	0.358	0.396	212	5.91	11	0.291	244	222	244	222	244	57.2	56.6	7.86	2.81	9.39	8.38	2.79	1740	1230	1.49	0.943	0.646	0.297	218	0.568	0.524	0.857	0.122	174	184	-54.5	229	90.9	81.8	111	5.66	244	56.3	7.78	174
C3	D3		1Myjump2	Experiment in fencing	Bilateral	Free	3	2022-04-07	0.552	0.4	157	1.96	5.6	0.118	245	129	245	206	245	90.2	71.7	12.4	5.64	8.04	7.75	2.8	1970	1170	1.71	0.583	0.167	0.416	40.1	0.571	0.098	0.492	0.069	217	185	-4.49	221	110	106	103	1.91	245	71.6	12.4	217
C3	D3		1Myjump2	Experiment in fencing	Bilateral	Free	4	2022-04-07	0.353	0.4	202	5.09	9.98	0.26	245	203	245	206	245	68.3	56.7	8.14	2.35	8.06	8.08	2.8	1650	1180	1.46	1.12	0.791	0.326	243	0.571	0.671	1.03	0.12	173	185	-47.9	221	86	86.9	99	4.89	245	56.4	8.08	173
C4	D4	61.6	1Myjump2	Experiment in fencing	Bilateral	Free	1	2022-04-07	0.244	0.265	201	4.9	9.87	0.247	217	194	217	214	217	59.6	41.6	5.66	2.69	10.5	6.76	2.28	1370	1130	1.31	0.812	0.558	0.254	220	0.465	0.443	0.716	0.115	135	140	-55.1	190	81.2	52.8	154	4.72	217	41.4	5.61	135
C4	D4		1Myjump2	Experiment in fencing	Bilateral	Free	2	2022-04-07	0.259	0.265	219	6.26	11.6	0.286	243	203	243	242	243	66.2	45.8	5.57	3.07	12.7	7.36	2.28	1530	1220	1.38	0.733	0.509	0.224	227	0.465	0.409	0.632	0.1	139	140	-48.5	187	87.2	50.6	172	6.04	242	45.6	5.52	139
C4	D4		1Myjump2	Experiment in fencing	Bilateral	Free	3	2022-04-07	0.267	0.273	200	4.91	9.84	0.249	217	197	217	210	217	56.9	44.4	6.26	2.81	10.1	6.75	2.32	1420	1120	1.36	0.813	0.541	0.272	199	0.472	0.414	0.726	0.127	141	143	-54.9	196	83.6	56.5	148	4.72	217	44.2	6.21	141
C5	D5	71.5	1Myjump2	Experiment in fencing	Bilateral	Free	1	2022-04-07	0.384	0.396	219	6.36	11.7	0.293	262	212	262	256	262	37.4	60.5	7.43	4.07	13	10	2.79	2230	1530	1.56	0.674	0.436	0.238	183	0.568	0.335	0.584	0.101	196	199	-74	270	110	85.2	129	6.12	262	60.2	7.37	196
C5	D5		1Myjump2	Experiment in fencing	Bilateral	Free	2	2022-04-07	0.4	0.398	228	7.21	12.6	0.323	258	230	258	253	258	34.2	60.9	7.72	3.97	13.3	9.8	2.8	2290	1530	1.61	0.705	0.464	0.241	193	0.57	0.277	0.613	0.187	199	200	-79.4	280	113	83.9	135	6.93	258	60.6	7.65	199
C5	D5		1Myjump2	Experiment in fencing	Bilateral	Free	3	2022-04-07	0.409	0.418	238	8.13	13.5	0.352	251	251	251	250	251	26.4	60.5	7.96	3.8	13.8	9.45	2.86	2340	1530	1.66	0.744	0.501	0.243	206	0.584	0.264	0.645	0.237	202	205	-93.2	296	120	82.3	145	7.79	251	60.1	7.89	202
C6	D6	54.8	1Myjump2	Experiment in fencing	Bilateral	Free	1	2022-04-07	0.374	0.346	227	7.08	12.4	0.319	242	227	242	237	242	26.3	56.5	7.9	3.84	12.5	7.94	2.6	1640	1100	1.63	0.705	0.441	0.264	167	0.531	0.288	0.596	0.153	148	143	-63.9	212	90.1	57.3	157	6.8	242	56.2	7.84	148
C6	D6		1Myjump2	Experiment in fencing	Bilateral	Free	2	2022-04-07	0.321	0.287	206	5.4	10.4	0.269	231	209	231	225	231	36	52.6	7.48	3.48	10.8	6.77	2.37	1430	1020	1.54	0.721	0.435	0.286	152	0.484	0.248	0.611	0.187	138	130	-60	198	83.9	53	158	5.18	231	52.3	7.42	138
C6	D6		1Myjump2	Experiment in fencing	Bilateral	Free	3	2022-04-07	0.336	0.311	209	5.6	10.7	0.274	229	209	229	216	229	32.2	51.7	7.47	3.32	10.7	7.58	2.47	1460	1040	1.51	0.772	0.491	0.281	175	0.504	0.275	0.685	0.216	141	135	-65.8	206	81.3	58.1	140	5.38	229	51.4	7.41	141
[truncated: 32 more columns]

## Sheet: Diving-CMJ
First Name	Last Name	Weight(kg）	Project	Lower Extremities	Upper Extremities	Repetition	Date	Jump Height from Take Off V [m]	Jump Height from Flight T [m]	Start interval relative F [%BW]	Start interval relative P [W/kg]	Start interval A [m/s^2]	Start interval V [m/s]	Relative maximal F [%BW]	Relative maximal F during Counter Movement [%BW]	Relative maximal F during Push Off [%BW]	Relative maximal F in the 1st half of Push Off [%BW]	Relative maximal F in the 2nd half of Push Off [%BW]	Relative minimal F [%BW]	Relative maximal P [W/kg]	Relative E [J/kg]	A [m/s^2]	A in the 1st half of Push Off [m/s^2]	A in the 2nd half of Push Off [m/s^2]	Vertical Take Off V [m/s]	Average P [W]	Average F [N]	Average V [m/s]	Jump T [s]	Counter Movement T [s]	Push Off T [s]	Ratio between Counter Movement and Push Off T [%]	Flight T [s]	Breaking T [s]	T to maximal F [s]	T to minimal F [s]	Push Off FI [Ns]	Push Off FI from Flight T [Ns]	Negative FI [Ns]	Positive FI [Ns]	FI in the 1st half of Push Off [Ns]	FI in the 2nd half of Push Off [Ns]	Ratio between FI in both halves of Push Off [%]	Left leg - Start interval relative P [W/kg]	Left leg - Relative maximal F [%BW]	Left leg - Relative maximal P [W/kg]	Left leg - Relative E [J/kg]	Left leg - Push Off FI [Ns]	Right leg - Start interval relative P [W/kg]
E1	F1	31.6	1Myjump2	Bilateral	Free	1	2022-04-05	0.335	0.364	205	5.23	10.3	0.255	259	199	259	255	259	26.5	54.4	6.64	3.61	12.3	9.43	2.67	893	654	1.45	0.709	0.474	0.235	202	0.545	0.331	0.613	0.143	80.9	84.5	-38.6	120	45.1	34.8	130	5.03	259	54.1	6.58	80.8	0.00828
E1	F1		1Myjump2	Bilateral	Free	2	2022-04-05	0.37	0.417	210	5.67	10.8	0.277	267	215	267	257	267	29.3	58.6	7.08	3.9	12.3	10.5	2.86	949	670	1.49	0.69	0.454	0.236	192	0.583	0.316	0.6	0.138	85	90.4	-39.7	125	45.4	39	116	5.44	266	58.3	7.02	84.9	0.0104
E1	F1		1Myjump2	Bilateral	Free	3	2022-04-05	0.395	0.425	215	6.08	11.2	0.292	273	230	273	259	273	29.8	61.7	7.27	4.07	12.6	11.6	2.89	1000	692	1.5	0.682	0.452	0.23	197	0.589	0.296	0.597	0.156	87.8	91.4	-40.3	128	45.4	41.9	108	5.82	273	61.3	7.2	87.7	0.00852
E2	F2	35.2	1Myjump2	Bilateral	Free	1	2022-04-05	0.288	0.293	201	4.93	9.93	0.246	247	195	247	243	247	46.4	50.4	6.18	3.23	11.6	7.86	2.4	893	688	1.4	0.735	0.491	0.244	201	0.489	0.316	0.644	0.175	83.5	84.5	-37	121	49.3	33.7	146	4.74	246	50.1	6.13	83.5	0.00756
E2	F2		1Myjump2	Bilateral	Free	2	2022-04-05	0.351	0.318	169	2.72	6.73	0.159	253	152	253	242	253	65.2	57.2	7.33	1.95	9.58	9.13	2.5	922	675	1.41	1.35	1.07	0.28	380	0.509	0.86	1.25	0.205	92.4	88	-10.2	103	46.9	45	104	2.62	253	57.1	7.29	92.4	0.0046
E2	F2		1Myjump2	Bilateral	Free	3	2022-04-05	0.385	0.296	116	0.405	1.55	0.035	245	111	245	202	245	95.3	58.8	8.41	4.74	4.61	9.37	2.41	754	592	1.2	0.579	0.186	0.393	47.3	0.491	0.16	0.48	0.026	96.8	84.9	-1.05	97.9	31.8	64.7	49.1	0.392	245	58.6	8.39	96.8	0.00116
E3	F3	46.7	1Myjump2	Bilateral	Free	1	2022-04-05	0.335	0.366	217	6.19	11.5	0.29	258	216	258	257	258	20.3	53.1	6.7	3.75	12.8	9.1	2.68	1340	970	1.48	0.683	0.449	0.234	192	0.546	0.317	0.572	0.132	120	125	-60.3	180	69.3	49.6	140	5.95	258	52.8	6.64	120	0.00533
E3	F3		1Myjump2	Bilateral	Free	2	2022-04-05	0.321	0.366	232	7.4	12.9	0.322	264	224	264	264	264	21.2	52.5	6.35	3.75	14.2	8.81	2.68	1360	995	1.5	0.668	0.45	0.218	206	0.546	0.322	0.557	0.128	117	125	-59.6	177	71.5	44.7	160	7.12	264	52.2	6.29	117	0.00558
E3	F3		1Myjump2	Bilateral	Free	3	2022-04-05	0.342	0.36	228	7.06	12.5	0.311	262	220	262	262	261	31.5	53.4	6.86	3.8	14	8.44	2.66	1390	984	1.55	0.68	0.45	0.23	196	0.542	0.333	0.554	0.117	121	124	-57	178	74.7	45.2	165	6.79	262	53.1	6.79	121	0.00583
E4	F4	36.4	1Myjump2	Bilateral	Free	1	2022-04-05	0.363	0.359	219	6.32	11.7	0.287	265	205	265	262	265	56.8	58.1	6.96	3.85	13.5	10	2.65	1120	785	1.52	0.691	0.464	0.227	204	0.541	0.272	0.598	0.192	97	96.7	-32.4	130	54.9	41.5	132	6.09	265	57.8	6.9	97	0.00649
E4	F4		1Myjump2	Bilateral	Free	2	2022-04-05	0.345	0.362	235	7.67	13.2	0.327	273	222	273	272	273	47.4	56.6	6.6	3.84	14.6	9.6	2.66	1120	799	1.53	0.677	0.463	0.214	216	0.543	0.308	0.575	0.155	94.4	97	-36.6	131	56.5	37.3	152	7.39	273	56.3	6.53	94.4	0.00796
E4	F4		1Myjump2	Bilateral	Free	3	2022-04-05	0.36	0.363	247	8.83	14.4	0.359	270	237	270	270	270	40.6	58.5	6.93	4.15	15.4	9.36	2.67	1170	808	1.6	0.639	0.424	0.215	197	0.544	0.265	0.537	0.159	96.8	97.2	-38.6	135	59.9	36.3	165	8.49	270	58.1	6.86	96.7	0.00963
E5	F5	31.7	1Myjump2	Bilateral	Free	1	2022-04-05	0.371	0.372	209	5.6	10.7	0.275	263	212	263	250	263	51.8	59.4	7.08	3.09	11.6	10.8	2.7	933	665	1.46	0.872	0.632	0.24	263	0.551	0.357	0.79	0.275	85.1	85.5	-32.3	118	43.8	40.8	107	5.37	262	59.1	7.01	85.1	0.00678
E5	F5		1Myjump2	Bilateral	Free	2	2022-04-05	0.419	0.403	220	6.5	11.8	0.301	261	218	261	253	261	40.5	61.8	7.97	3.78	12.5	10.6	2.81	1020	676	1.59	0.757	0.509	0.248	205	0.573	0.285	0.66	0.224	90.5	89	-32.4	123	48.5	41.5	117	6.24	261	61.5	7.9	90.4	0.00779
E5	F5		1Myjump2	Bilateral	Free	3	2022-04-05	0.395	0.382	229	7.3	12.7	0.328	254	234	254	245	254	38.7	59.4	7.73	3.74	12.6	9.73	2.74	987	664	1.59	0.744	0.496	0.248	200	0.558	0.263	0.649	0.233	87.7	86.6	-35.3	123	49.2	38.1	129	7	254	59	7.66	87.7	0.00745
E6	F6	24.7	1Myjump2	Bilateral	Free	1	2022-04-05	0.374	0.348	226	6.91	12.3	0.309	249	220	249	249	247	40.6	54.4	7.6	3.69	13.4	8.45	2.61	757	512	1.61	0.732	0.484	0.248	195	0.533	0.329	0.592	0.155	66.9	64.6	-26.6	93.5	40.7	25.8	158	6.64	249	54	7.53	66.9	0.00739
E6	F6		1Myjump2	Bilateral	Free	2	2022-04-05	0.419	0.371	243	8.43	14	0.347	266	233	266	266	258	45.3	58.1	8.13	4.16	15.2	8.89	2.7	844	539	1.72	0.688	0.45	0.238	189	0.55	0.295	0.54	0.155	70.7	66.6	-25.8	96.6	44.2	26.1	170	8.11	265	57.7	8.05	70.6	0.00938
E6	F6		1Myjump2	Bilateral	Free	3	2022-04-05	0.421	0.375	261	10.2	15.8	0.396	274	256	274	274	272	31.2	61.2	7.79	4.7	16.3	9.99	2.71	883	567	1.71	0.61	0.392	0.218	180	0.553	0.218	0.487	0.174	70.8	67	-30.4	101	43.5	26.8	163	9.82	274	60.8	7.7	70.7	0.0106
E7	F7	29.5	1Myjump2	Bilateral	Free	1	2022-04-05	0.339	0.387	281	12.5	17.7	0.458	302	302	290	290	282	13	56.1	6.23	4.52	17.8	9.97	2.76	989	700	1.58	0.569	0.383	0.186	206	0.562	0.199	0.352	0.184	76.1	81.4	-43	119	48.3	27.3	177	12	302	55.6	6.14	76.1	0.004
E7	F7		1Myjump2	Bilateral	Free	2	2022-04-05	0.335	0.386	294	14	19	0.488	325	325	303	303	289	14.9	55.4	5.98	4.69	19.1	10.1	2.75	1010	721	1.57	0.545	0.37	0.175	211	0.561	0.191	0.342	0.179	75.2	81.3	-42.5	118	48.4	25.7	188	13.4	325	54.9	5.89	75.2	0.00673
E7	F7		1Myjump2	Bilateral	Free	3	2022-04-05	0.301	0.368	322	17.5	21.8	0.552	381	381	326	326	290	9.67	52.6	5.38	4.31	21.3	9.49	2.69	1010	745	1.55	0.563	0.405	0.158	256	0.548	0.179	0.363	0.226	71.7	79.4	-52.7	124	49.1	22	223	16.8	381	52.1	5.29	71.7	0.00519
[truncated: 9 more columns]

## Sheet: Swimming-CMJ
First Name	Last Name	Weight(kg）	Project	Visit	Lower Extremities	Upper Extremities	Repetition	Date	Jump Height from Take Off V [m]	Jump Height from Flight T [m]	Start interval relative F [%BW]	Start interval relative P [W/kg]	Start interval A [m/s^2]	Start interval V [m/s]	Relative maximal F [%BW]	Relative maximal F during Counter Movement [%BW]	Relative maximal F during Push Off [%BW]	Relative maximal F in the 1st half of Push Off [%BW]	Relative maximal F in the 2nd half of Push Off [%BW]	Relative minimal F [%BW]	Relative maximal P [W/kg]	Relative E [J/kg]	A [m/s^2]	A in the 1st half of Push Off [m/s^2]	A in the 2nd half of Push Off [m/s^2]	Vertical Take Off V [m/s]	Average P [W]	Average F [N]	Average V [m/s]	Jump T [s]	Counter Movement T [s]	Push Off T [s]	Ratio between Counter Movement and Push Off T [%]	Flight T [s]	Breaking T [s]	T to maximal F [s]	T to minimal F [s]	Push Off FI [Ns]	Push Off FI from Flight T [Ns]	Negative FI [Ns]	Positive FI [Ns]	FI in the 1st half of Push Off [Ns]	FI in the 2nd half of Push Off [Ns]	Ratio between FI in both halves of Push Off [%]	Left leg - Start interval relative P [W/kg]	Left leg - Relative maximal F [%BW]	Left leg - Relative maximal P [W/kg]	Left leg - Relative E [J/kg]	Left leg - Push Off FI [Ns]
G1	H1	56.8kg	1Myjump2	swimming group-4.7	Bilateral	Free	1	2022-04-07	0.263	0.27	194	4.47	9.2	0.235	211	193	211	194	211	12.5	44	6.38	3.01	8.89	6.65	2.3	1240	999	1.32	0.753	0.461	0.292	158	0.469	0.331	0.67	0.13	129	131	-60.8	190	73.3	55.2	133	4.29	211	43.8	6.33	129
G1	H1		1Myjump2	swimming group-4.8	Bilateral	Free	2	2022-04-07	0.266	0.267	196	4.68	9.46	0.245	200	200	200	200	196	14.3	41.9	7	2.88	8.21	5.63	2.29	1210	951	1.35	0.791	0.461	0.33	140	0.467	0.344	0.458	0.117	130	130	-71.5	201	76.5	52.9	145	4.49	200	41.7	6.94	130
G1	H1		1Myjump2	swimming group-4.9	Bilateral	Free	3	2022-04-07	0.264	0.284	196	4.61	9.37	0.242	202	197	202	198	202	20.1	43	7.01	2.64	8.22	5.56	2.36	1210	949	1.37	0.86	0.531	0.329	161	0.481	0.373	0.776	0.158	129	134	-68	197	76.6	52.2	147	4.43	202	42.8	6.95	129
G2	H2	52.6kg	1Myjump2	swimming group-4.10	Bilateral	Free	1	2022-04-07	0.324	0.337	177	3.38	7.57	0.196	239	181	239	207	239	50.3	53.4	7.31	2.86	7.97	8.25	2.57	1240	943	1.36	0.879	0.569	0.31	184	0.524	0.419	0.789	0.15	132	135	-50.6	183	64.5	67.3	95.9	3.25	239	53.2	7.26	132
G2	H2		1Myjump2	swimming group-4.11	Bilateral	Free	2	2022-04-07	0.325	0.325	169	2.83	6.77	0.169	233	167	233	227	233	68.2	53.1	7.35	2.64	8.75	7.89	2.53	1280	955	1.4	0.954	0.651	0.303	215	0.515	0.394	0.829	0.257	133	133	-42.5	175	69	62.6	110	2.72	233	53	7.31	133
G2	H2		1Myjump2	swimming group-4.12	Bilateral	Free	3	2022-04-07	0.337	0.346	166	2.7	6.51	0.165	237	165	237	218	237	73.8	53.6	7.51	2.58	7.94	8.42	2.6	1260	947	1.36	0.995	0.681	0.314	217	0.531	0.55	0.9	0.131	135	137	-41	176	65.1	69.5	93.7	2.59	237	53.4	7.48	135
G3	H3	71.1kg	1Myjump2	swimming group-4.13	Bilateral	Free	1	2022-04-07	0.34	0.363	183	3.74	8.12	0.21	221	187	221	199	221	33.8	49.4	7.97	2.9	7.81	7.63	2.67	1700	1250	1.41	0.89	0.556	0.334	166	0.544	0.354	0.77	0.202	183	190	-86.7	271	92.2	90.6	102	3.59	221	49.2	7.92	183
G3	H3		1Myjump2	swimming group-4.14	Bilateral	Free	2	2022-04-07	0.332	0.339	191	4.32	8.88	0.235	214	202	214	200	214	33.3	47.3	7.91	3	7.85	7.29	2.58	1670	1240	1.42	0.848	0.512	0.336	152	0.526	0.353	0.736	0.159	181	184	-89.1	271	93.1	87.1	107	4.14	214	47.1	7.85	181
G3	H3		1Myjump2	swimming group-4.15	Bilateral	Free	3	2022-04-07	0.327	0.343	198	4.82	9.59	0.253	220	206	220	205	220	21.7	48.5	7.85	2.96	7.89	7.32	2.59	1680	1240	1.42	0.854	0.521	0.333	156	0.529	0.323	0.752	0.198	180	185	-95.6	276	92.5	86.5	107	4.62	220	48.2	7.79	180
G4	H4	59.7kg	1Myjump2	swimming group-4.16	Bilateral	Free	1	2022-04-07	0.353	0.341	173	3.05	7.15	0.178	256	168	256	254	256	76.7	53.2	7.32	2.82	10.3	9.04	2.58	1600	1160	1.44	0.933	0.66	0.273	242	0.527	0.356	0.809	0.304	157	154	-38.1	195	83.2	73.7	113	2.93	256	53	7.28	157
G4	H4		1Myjump2	swimming group-4.17	Bilateral	Free	2	2022-04-07	0.319	0.325	162	2.39	6.04	0.149	220	158	220	213	220	61.7	46.4	7.52	2.56	7.99	7.29	2.53	1370	1040	1.36	0.976	0.649	0.327	198	0.515	0.442	0.86	0.207	149	151	-53.1	202	77.2	70.8	109	2.3	220	46.2	7.48	149
G4	H4		1Myjump2	swimming group-4.18	Bilateral	Free	3	2022-04-07	0.325	0.325	120	0.562	1.93	0.0477	244	123	244	156	244	69.3	52.1	7.42	1.93	2.16	8.74	2.53	956	910	0.931	1.3	0.84	0.463	181	0.515	0.598	1.21	0.242	151	151	-37.2	188	29.6	121	24.6	0.541	244	52	7.4	151
G5	H5	62.9kg	1Myjump2	swimming group-4.19	Bilateral	Free	1	2022-04-07	0.37	0.368	174	3.15	7.24	0.185	213	175	213	184	213	64.2	50.6	9.11	2.6	7.02	6.99	2.69	1490	1060	1.46	1.03	0.65	0.384	169	0.548	0.508	0.924	0.142	169	169	-60.2	230	84.2	84.4	99.8	3.03	213	50.5	9.06	169
G5	H5		1Myjump2	swimming group-4.20	Bilateral	Free	2	2022-04-07	0.358	0.359	176	3.3	7.45	0.192	205	180	205	193	205	43.2	48	8.92	2.67	7.57	6.62	2.65	1500	1060	1.48	0.989	0.616	0.373	165	0.541	0.438	0.871	0.178	166	167	-65.9	233	88.5	77.9	114	3.17	205	47.8	8.87	166
G5	H5		1Myjump2	swimming group-4.21	Bilateral	Free	3	2022-04-07	0.357	0.33	170	2.9	6.82	0.175	209	177	209	206	209	28.7	47.2	8.7	2.78	7.95	6.74	2.55	1520	1080	1.47	0.952	0.592	0.36	164	0.519	0.379	0.807	0.213	166	160	-71.4	238	89.5	76.2	117	2.79	209	47	8.66	166
G6	H6	53.1kg	1Myjump2	swimming group-4.22	Bilateral	Free	1	2022-04-07	0.235	0.274	171	2.91	6.96	0.171	223	163	223	214	223	66	41.8	5.4	1.92	8.59	7.53	2.32	1080	948	1.19	1.12	0.85	0.266	320	0.473	0.457	1.02	0.393	114	123	-47.5	162	60.2	53.1	113	2.81	223	41.6	5.38	114
G6	H6		1Myjump2	swimming group-4.23	Bilateral	Free	2	2022-04-07	0.228	0.286	166	2.63	6.46	0.16	216	160	216	197	216	59.3	41.3	5.71	1.78	7.58	6.58	2.37	1020	896	1.19	1.18	0.885	0.298	297	0.483	0.51	1.09	0.375	112	126	-51.7	164	59.5	52	114	2.53	215	41.2	5.68	112
G6	H6		1Myjump2	swimming group-4.24	Bilateral	Free	3	2022-04-07	0.219	0.277	168	2.76	6.65	0.167	214	163	214	205	214	48.6	40.7	5.58	1.82	7.79	6.3	2.33	1010	895	1.19	1.14	0.844	0.293	288	0.475	0.476	1.03	0.368	110	124	-56.3	166	59.9	48.8	123	2.66	214	40.5	5.54	110
G7	H7	56.7kg	1Myjump2	swimming group-4.25	Bilateral	Free	1	2022-04-07	0.214	0.218	181	3.58	7.94	0.202	222	179	222	197	222	31.4	42.4	5.68	2.55	8.15	5.77	2.07	1100	951	1.24	0.8	0.506	0.294	172	0.422	0.379	0.709	0.127	116	117	-55.9	172	67.5	48.1	140	3.45	222	42.2	5.64	116
G7	H7		1Myjump2	swimming group-4.26	Bilateral	Free	2	2022-04-07	0.281	0.302	178	3.46	7.68	0.2	219	181	219	195	219	42.5	46.6	6.83	2.59	7.48	7.15	2.43	1210	971	1.29	0.904	0.583	0.321	182	0.496	0.45	0.82	0.133	133	138	-58.9	192	67.8	65.3	104	3.32	219	46.4	6.79	133
G7	H7		1Myjump2	swimming group-4.27	Bilateral	Free	3	2022-04-07	0.297	0.302	176	3.33	7.48	0.194	222	178	222	186	222	40.2	48.1	7.19	2.66	7.31	7.22	2.43	1230	969	1.31	0.906	0.574	0.332	173	0.496	0.429	0.823	0.145	137	138	-55.4	192	68.4	68	101	3.19	222	47.9	7.15	137
G8	H8	55kg	1Myjump2	swimming group-4.28	Bilateral	Free	1	2022-04-07	0.533	0.537	202	5.05	9.97	0.257	270	203	270	233	270	31.9	73.5	10	4.2	10.1	11.6	3.25	2330	1420	1.66	0.768	0.471	0.297	159	0.662	0.274	0.683	0.197	222	223	-72.1	294	103	119	86.4	4.85	270	73.3	9.98	222
G8	H8		1Myjump2	swimming group-4.29	Bilateral	Free	2	2022-04-07	0.535	0.524	200	4.89	9.76	0.25	274	200	274	251	274	35.8	73.3	10	4.35	10.8	11.6	3.21	2400	1450	1.7	0.744	0.456	0.288	158	0.654	0.249	0.648	0.207	222	221	-61.4	284	106	115	92.3	4.69	274	73	9.98	222
G8	H8		1Myjump2	swimming group-4.30	Bilateral	Free	3	2022-04-07	0.535	0.544	198	4.75	9.58	0.246	241	199	241	217	241	61.4	67.8	10.8	3.58	9.66	9.82	3.27	2240	1340	1.71	0.904	0.572	0.332	172	0.666	0.265	0.816	0.307	222	225	-57.1	280	110	112	97.8	4.56	241	67.6	10.8	222
G9	H9	68.8kg	1Myjump2	swimming group-4.31	Bilateral	Free	1	2022-04-07	0.456	0.49	186	3.98	8.45	0.22	242	205	242	217	242	21.1	61.9	9.33	3.69	8.71	9.9	3.1	1950	1290	1.54	0.809	0.488	0.321	152	0.632	0.32	0.728	0.168	201	208	-96.9	298	93	106	87.4	3.81	242	61.7	9.27	201
G9	H9		1Myjump2	swimming group-4.32	Bilateral	Free	2	2022-04-07	0.497	0.487	198	4.85	9.59	0.255	234	218	234	210	234	41.1	62.9	10.5	3.28	7.95	9.4	3.09	1960	1240	1.6	0.95	0.591	0.359	165	0.63	0.269	0.866	0.322	209	208	-87	297	94.9	113	83.9	4.64	234	62.6	10.4	209
G9	H9		1Myjump2	swimming group-4.33	Bilateral	Free	3	2022-04-07	0.492	0.487	198	4.85	9.62	0.254	225	225	224	210	224	21.7	60.2	10.5	3.56	8.92	8.8	3.09	2020	1250	1.66	0.871	0.521	0.35	149	0.63	0.287	0.477	0.234	208	208	-99.7	308	104	104	101	4.64	225	60	10.4	208
G10	H10	67.2kg	1Myjump2	swimming group-4.34	Bilateral	Free	1	2022-04-07	0.353	0.367	205	5.18	10.3	0.255	240	201	240	240	239	25.7	52.8	7.61	3.49	11.9	7.51	2.68	1550	1070	1.56	0.753	0.483	0.27	179	0.547	0.305	0.606	0.178	144	147	-62.7	207	88	55.6	158	4.99	240	52.6	7.55	144
G10	H10		1Myjump2	swimming group-4.35	Bilateral	Free	2	2022-04-07	0.356	0.38	186	3.88	8.42	0.211	226	193	226	226	226	32.7	51.3	7.97	3.31	10.2	7.38	2.73	1460	1020	1.52	0.797	0.497	0.3	166	0.557	0.37	0.66	0.127	145	150	-64.7	210	83.5	60.8	137	3.72	226	51.1	7.92	145
G10	H10		1Myjump2	swimming group-4.36	Bilateral	Free	3	2022-04-07	0.37	0.371	185	3.92	8.32	0.22	223	200	223	214	223	29.7	53.3	8.3	3.24	8.92	7.92	2.7	1430	1000	1.49	0.831	0.511	0.32	160	0.55	0.314	0.74	0.197	148	148	-69.1	217	77.8	69.6	112	3.75	223	53	8.25	148
[truncated: 10 more columns]
